# Supplementary material
Source: PubMed Central journal article supplement (PMC3621120)
Supplement: NIHMS392737-supplement-Supp_Fig_S2.pdf [file NIHMS392737-supplement-Supp_Fig_S2.pdf]

Majority

|                              | ADGQIYQRPXETSXKAVRDAING--WDPSGGALYYFNP---DTATSKWIW--SRPQIKRIGKHIFCK-----          |
|------------------------------|-----------------------------------------------------------------------------------|
|                              | -----+-----+-----+-----+-----+-----+-----+-----+-----+-----                       |
|                              | 200 210 220 230 240 250                                                           |
|                              | -----+-----+-----+-----+-----+-----+-----+-----+-----+-----                       |
| B.anthraxisSleB              | ADGQIYLTTPNETAKKAVLDAING--WDPTGNALYYFNP---DTATSKWIW--TRPQIKKIGKHIFCK              |
| B.cereus10987SleB            | ADGQIYLTTPNETAKKAVLDAING--WDPTGNALYYFNP---DTATSKWIW--TRPQIKKIGKHIFCK              |
| B.haloduransC-125SleB        | ADGQIYMTDPDETARRAVLDALNG--QDPSGGATYYFNP---DTATSGWIW--SRPQIKRIGKHIFCN              |
| B.licheniformisATCC14580SleB | ADGQIYMTDPDETAKKAVLDAING--WDPSENATYYFNP---DTATSSWIW--GRPQIKRIGKHIFCE              |
| B.pumilusSAFR-032SleB        | ADGQFYMSPNETAKKAVFDAING--WDPSESAVYYFNP---DTATSPWIW--GRPQIKRIGKHIFCE               |
| B.subtilisSleB               | ADGQIYMQPNETAREAVLDAING--WDPSEEALYYFNP---DTATSPWIW--GRPQIKRIGKHIFCE               |
| B.weihestephanensisKSleB     | ADGQIYLTTPNENAKKAVLDAING--WDPTGNALYYFNP---DTATSKWIW--TRPQIKKIGKHIFCK              |
| C.botulinumA2KyotoSleB       | ADGQINAQMQQTSINAARDALNG--WDPDSDGATYYFNP---ATATSSWIW--SRPLIKVIGKHRFCR              |
| C.kluyveriDSM555SleB         | VDGQVHANMEQNSINAARDALNG--WDPSEGAIIYYFNP---STATSSWIW--SRPLIKIIGKHRFCR              |
| C.tetaniE88SleB              | ADGQVNAAMEQSSMKAAMDAING--WDPSSGAVYYFNP---ATATSSWIW--SRPLIKVIGKHRFCR               |
| DesulfotomaculumreducensSleB | NDGQFYLPNEASFRAVEAAIKG--WDPTRGAIYYWNP---KTATSRWIW--SRPISLKIGNHVFN                 |
| GeobacilluskaustophilisSleB  | ADGQIWLTPNETAKKAVLDAING--WDPTGGAIYYFNP---ATATSAWIW--SRPQIKRIGNHIFCK               |
| Geobacillusthermodenitr.SleB | ADGQIWLTPNETAKKAVLDAING--WDPSSGAIYYFNP---ATATSAWIW--SRPQIKRIGQHIFCK               |
| OceanobacillusihyensisSleB   | ADGQIWLPEPNDKAREAVLDAING--WDPSSGNALYYFNP---DTATSGWIW--TRPQIKQIGKHIFCK             |
| Thermoanaerobactertenc.SleB  | EDGQMWLPPTEESIKAADIVAVG--WDPTGGALYYNA---ARVTNYWIF--TRPILTQIGRHIFAR                |
| B.anthraxisSterneCwlJ1       | QKGYFYQRAREQDIALARRTIQGQRFWPANFALWFFRP-EG-PCPPTWYN---QNSGRFKKHCFQPSGEDCPSVY       |
| B.anthraxisSterneCwlJ2       | QYGYFYQRARESEKEIARKVLQGEWRWPANFALWFFRP-VG-ACPEWYN---QPFVGFQKSHCFYEPGNECPKLYSR     |
| B.cereus10987CwlJ            | QKGYFYQRAREQDIALARRTIQGQRFWPANFALWFFRP-EG-ACPPTWYN---QNSGRFKKHCFQPNAGDCPSIY       |
| B.licheniformisATCC14CwlJ    | THGYFYQRARESERLARRAVNGERLWPAKFSLWYFRP-AG-ACPAQWYN---QPHVGRFKSHCFYPTAEECENVYNTF    |
| B.pumilusSAFR-032CwlJ        | THGYFYQRARETEKTLARRNINGERFWPAKFSLWYFKP-PG-NCPPPTWYN---QPFVARYKSHCFYQPTAETCENVYNTF |
| B.subtilisCwlJ               | THGYFYQRARDSERALARRSINGERRWPAKFSLWYFRP-QG-DCPAQWYN---QPFVARFKSHCFYQPTAETCENVYNTF  |
| GeobacilluskaustophilisCwlJ  | QKGYFYQRAREVDIGLARQVLRGWRYHPATNALWFFKPPGQPCPPQWFG---QWNVGGRYKSHCFYPTSDCPRVYS      |
| OceanobacillusihyensisCwlJ   | QKGYFYQRARQSEIRLARRVIQGERQHPASNSLWFFMP-EG-ACPEQWYG---QWNVGGRYKSHCFYPTAADCPEVFR    |
| B.amyloliquefaciensFZYkvT    | ANGSINQKPKDKSIAAANEALDH--PGRETNALFFYFNP---KTASDHWIR--SRKIIERIGRHVFAV              |
| B.anthraxisSterneYkvT        | TDGRINHPASPEAKMAVEEAIST--NGIHSDWLYFYFNP---KTSTDKWIT--TRQTVAVIGNHVFAK              |
| B.cereus10987YkvT            | TDGRINQPASAEAKMAVEEAIST--NGIHSDWLYFYFNP---KTSTDKWIT--TRQTVAVIGNHVFAK              |
| B.clausiiKSM-K16YkvT         | LDGAINNEPDESRRRAVTEALAF--RGQGQSSLYFYFNP---KTATSGWVA--TREQTLVIGDHIFAK              |
| B.pumilusSAFR-032YkvT        | SNGSIHDKADQDSVKAQVQVKE--HRTTKAIYFYFNP---KTATDNWIR--SRKIVERIGRHVFAV                |
| B.subtilisYkvT               | ANGSINQKPKDESIEAAEEALSS--KNRETDIIFYFNP---KTASDNWIR--SRKIVEKIGRHVFAV               |
| C.botulinumAHallYkvT         | ADGQINAQMQQTSINAARDALNG--WDPDSDGATYYFNP---ATATSSWIW--SRPLIKVIGKHRFCR              |
| C.novyiNTYkvT                | VDGQINAEIQSSIKAARDALNG--WDPDSDGAVYYFNP---DTATSGWIW--SRPLIKIIGKHRFCS               |
| C.perfringensATCC13124YkvT   | RNGKIDVVPDGDYSNAVLKAIEG--YDPTNEALYFYFNP---KIATCSWMMKVEKTGEKSIGQHVFFNVT            |
| GeobacilluskaustophilisYkvT  | ANGSIN-ERRRESYRAVEEALAF--RGLGNGSLYFYFNP---KTAKSKWLR--SRPVTTVIGNHVFAK              |
| OceanobacillusihyensisYkvT   | SNGKINKPAGKESKNAVEEALYTD-RSLVTEISLYFYFNP---DTATSRWLD--DKVTTEVIGNHVFKD             |

Alignment to *B. anthracis* SleB<sub>CAT</sub>. All other proteins were shortened to the same length upstream of the catalytic E residue (Red), except CwlJ proteins which are included as full-length proteins. Residue numbering corresponds to the sequence of the *B. anthracis* SleB that was examined in this study.

Yellow are SleB proteins. Identification is relatively strong, based upon direct genetic studies or on the presence of an adjacent *ypeB* gene, which is involved in stabilization of SleB in the spore.

Green are CwlJ proteins. Identification is relatively strong, based upon direct genetic studies or upon sequence similarity and genome context.

Grey are presumptive YkvT proteins. This protein is known to be expressed in vegetative *B. subtilis* cells and to have no significant effect on spore germination. Identification in other species is based solely on greater sequence similarity to *B. subtilis* YkvT than to SleB.
