# Supplementary material
Source: PubMed Central journal article supplement (PMC3621120)
Supplement: NIHMS392737-supplement-Supp_Table_S1.pdf [file NIHMS392737-supplement-Supp_Table_S1.pdf]

1 **Table S1. Failure of *sleB*<sup>E151A</sup> to complement for germination function.**

2

\_\_\_\_\_ cfu/ml/OD<sub>600</sub><sup>a</sup> \_\_\_\_\_

3 **Strain**      **Genotype**      **-lysozyme**      **+lysozyme**

---

4 DPBA61      *ΔcwlJI*      2x10<sup>8</sup>      8x10<sup>7</sup>

5 DPBA74      *ΔcwlJI ΔsleB*      2x10<sup>5</sup>      4x10<sup>7</sup>

6 DPBA145      *ΔcwlJI ΔsleB/pDPV346 sleB*      1x10<sup>8</sup>      6x10<sup>7</sup>

7 DPBA151      *ΔcwlJI ΔsleB/pDPV430 sleB*<sup>E151A</sup>      1x10<sup>5</sup>      4x10<sup>7</sup>

---

8

9 <sup>a</sup> Spores were plated onto BHI medium with and without 1 μg/ml of lysozyme.
