# Supplementary material
Source: PubMed Central journal article supplement (PMC3621120)

**Figure S1**

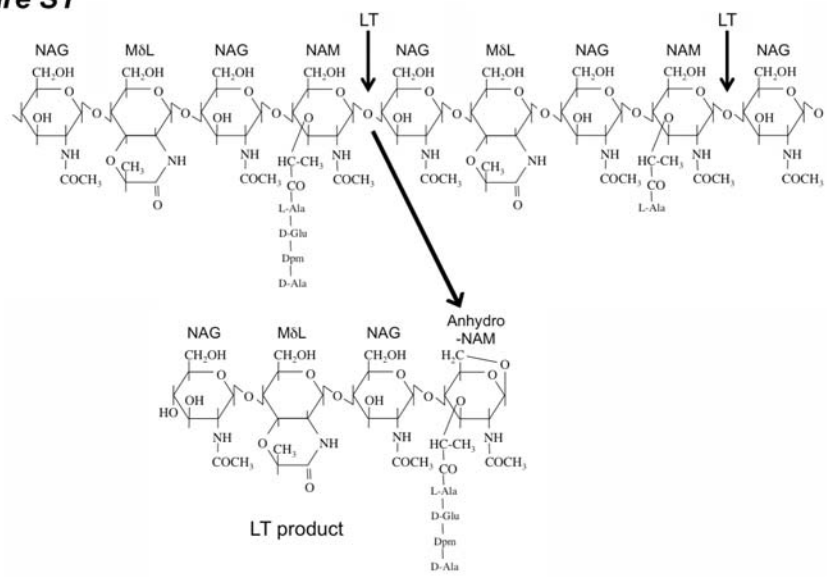

Supplement: NIHMS392737-supplement-Supp_Fig_S1.pdf [file NIHMS392737-supplement-Supp_Fig_S1.pdf]
